# Supplementary material
Source: PubMed Central journal article supplement (PMC5708291)
Supplement: ry161772suppa1.pdf [file ry161772suppa1.pdf]

**Table E1. Average Tumor Weight**

| Parameter       | In Vivo Weight           |                         |                         | Ex Vivo Weight          |
|-----------------|--------------------------|-------------------------|-------------------------|-------------------------|
|                 | Before Therapy           | 2 days after Therapy    | 2 weeks after Therapy   | At Necropsy             |
| Control         | 0.09 ± 0.08 (0.07–0.26)  | 0.22 ± 0.11 (0.07–0.39) | 0.61 ± 0.40 (0.15–0.83) | 0.56 ± 0.33 (0.21–0.76) |
| Pazopanib       | 0.02 ± 0.01 (0.004–0.05) | 0.05 ± 0.04 (0.02–0.14) | 0.14 ± 0.06 (0.08–0.25) | 0.21 ± 0.06 (0.13–0.32) |
| <i>P</i> value* |                          | <.026                   | .025*                   | <.036                   |

Note.—Weight is in grams. Data are mean ± standard deviation unless otherwise indicated; data in parentheses are range. There were seven control animals; for pazopanib, before therapy there were seven animals and after therapy there were six animals.

\* *P* value is control versus pazopanib.

**Table E2. Average Tumor Volume**

| Parameter                                          | Day 0                      | Day 2                   | Day 4                   | Day 6                   | Day 8                   | Day 10                  | Day 12                  | Day 14                  | No. of Animals |
|----------------------------------------------------|----------------------------|-------------------------|-------------------------|-------------------------|-------------------------|-------------------------|-------------------------|-------------------------|----------------|
| Control                                            | 0.012 ± 0.004 (0.005–0.02) | 0.06 ± 0.03 (0.32–0.11) | 0.20 ± 0.13 (0.04–0.42) | 0.26 ± 0.19 (0.07–0.53) | 0.51 ± 0.39 (0.08–1.15) | 0.68 ± 0.47 (0.20–1.35) | 1.49 ± 0.63 (0.83–2.52) | 1.68 ± 0.72 (0.91–2.83) | 7              |
| Pazopanib                                          | 0.011 ± 0.003 (0.005–0.01) | 0.02 ± 0.01 (0.01–0.02) | 0.08 ± 0.04 (0.03–0.12) | 0.08 ± 0.05 (0.03–0.13) | 0.08 ± 0.05 (0.31–0.17) | 0.07 ± 0.01 (0.05–0.08) | 0.26 ± 0.05 (0.21–0.32) | 0.32 ± 0.04 (0.26–0.39) | 7 or 6         |
| <i>P</i> value, control vs pazopanib               |                            | <.00085                 | <.039                   | <.03                    | <.02                    | <.0083                  | <.00015                 | <.00014                 |                |
| <i>P</i> value, comparison of days after treatment |                            |                         | 2 d vs 4 d, <.0038      | 4 d vs 6 d, <.80        | 6 d vs 8 d, <.83        | 8 d vs 10 d, <.68       | 10 d vs 12 d, <.0000034 | 12 d vs 14 d, <.029     |                |

Note.—Tumor volume is in cubic centimeters. Data are mean ± standard deviation unless otherwise indicated; data in parentheses are range. There were seven control animals; for pazopanib, before therapy there were seven animals and after therapy there were six animals.

**Table E3. Average Normalized Pyruvate/Pyruvate + Lactate**

| Group               | Normalized Lactate/(Pyruvate + Lactate) |                         |                         |  | No. of Animals | Difference Estimate, 2 days vs before Therapy |
|---------------------|-----------------------------------------|-------------------------|-------------------------|--|----------------|-----------------------------------------------|
|                     | Before Therapy                          | 2 days after Therapy    | 2 weeks after Therapy   |  |                |                                               |
| Control             | 0.29 ± 0.10 (0.21–0.42)                 | 0.35 ± 0.07 (0.24–0.45) | 0.32 ± 0.05 (0.26–0.38) |  | 7              | 0.06 ± 0.05                                   |
| Pazopanib           | 0.31 ± 0.14 (0.19–0.57)                 | 0.46 ± 0.07 (0.39–0.59) | 0.37 ± 0.08 (0.30–0.46) |  | 7 or 6         | 0.15 ± 0.06                                   |
| Difference Estimate | 0.02 ± 0.05                             | 0.11 ± 0.05             | 0.04 ± 0.05             |  |                |                                               |

Note.—Data are mean ± standard deviation unless otherwise indicated; data in parentheses are range. There were seven control animals; for pazopanib, before therapy there were seven animals and after therapy there were six animals. *P* value of change, control versus pazopanib, at 2 days was <.039. *P* value before treatment versus at 2 days after treatment was <.012.

**Table E4. Average Percent <sup>18</sup>F-FDG Dose Injected Per Gram**

| Group | Before Therapy | 2 days after Therapy | 2 weeks after Therapy |
|-------|----------------|----------------------|-----------------------|
|       |                |                      |                       |

|           |                         |                         |                         |
|-----------|-------------------------|-------------------------|-------------------------|
| Control   | 2.06 ± 1.84 (0.12–5.80) | 1.81 ± 0.70 (0.88–2.60) | 2.73 ± 2.20 (0.86–7.10) |
| Pazopanib | 1.57 ± 0.36 (1.20–1.70) | 2.31 ± 1.30 (0.35–3.90) | 2.87 ± 1.56 (0.84–5.40) |

Note.—Data are mean percentage of injected dose per gram ± standard deviation; data in parentheses are range. There were seven control animals; for pazopanib, before therapy there were seven animals and after therapy there were six animals.
